# Supplementary material for: Flavor Profiling Using Comprehensive Mass Spectrometry Analysis of Metabolites in Tomato Soups
Source: MDPI journal article supplement (doi:10.3390/metabo12121194), 2022-11-29
Supplement: s1 [file s1]

# Supporting Information

## **Flavor profiling by comprehensive mass spectrometry analysis of metabolites in tomato soups**

Simon Leygeber<sup>1</sup>, Justus L. Grossmann<sup>2</sup>, Carmen Diez-Simon<sup>3</sup>, Naama Karu<sup>1</sup>, Anne-Charlotte Dubbelman<sup>1</sup>, Amy C. Harms<sup>1</sup>, Johan A. Westerhuis<sup>2</sup>, Doris M. Jacobs<sup>4</sup>, Peter W. Lindenburg<sup>1,5</sup>, Margriet M.W.B. Hendriks<sup>6</sup>, Brenda Ammerlaan<sup>6</sup>, Marco A. van den Berg<sup>7</sup>, Rudi v Doorn<sup>7</sup>, Roland Mumm<sup>1,8</sup>, Robert D. Hall<sup>1,3,8</sup>, Age K. Smilde<sup>2</sup>, Thomas Hankemeier<sup>1\*</sup>

<sup>1</sup>Leiden Academic Centre for Drug Research, Leiden University, Einsteinweg 55, 2333 CC Leiden, The Netherlands

<sup>2</sup>Swammerdam Institute for Life Sciences, University of Amsterdam, Science Park 904, 1098 XH, Amsterdam, The Netherlands

<sup>3</sup>Laboratory of Plant Physiology, Wageningen University and Research, Droevendaalsesteeg 1, Wageningen, 6708 PB, The Netherlands

<sup>4</sup>Unilever Foods Innovation Centre, Bronland 14, Wageningen, 6708 WH, The Netherlands

<sup>5</sup>Leiden Center for Applied Bioscience, University of Applied Sciences Leiden, Zernikedreef 11, 2333 CK Leiden, The Netherlands

<sup>6</sup>DSM Biodata & Translation, Alexander Fleminglaan 1, Delft 2613 AX, The Netherlands

<sup>7</sup>DSM Food & Beverages, Alexander Fleminglaan 1, Delft 2613 AX, The Netherlands

<sup>8</sup>Wageningen Research (Bioscience), Wageningen University and Research, Droevendaalsesteeg 1, The Netherlands

\*Thomas Hankemeier, [hankemeier@lacdr.leidenuniv.nl](mailto:hankemeier@lacdr.leidenuniv.nl)

## List of figures

**Figure S1** Original sensory scores of all samples and flavor attributes

**Figure S2** Quality control of LC-MS, GC-MS data by PCAs

**Figure S3** MS/MS spectra of Asp-Leu in tomato soup 05-1 mirrored against a pure standard

**Figure S4** MS/MS spectra of Met-Pro in tomato soup 19-2 mirrored against a pure standard

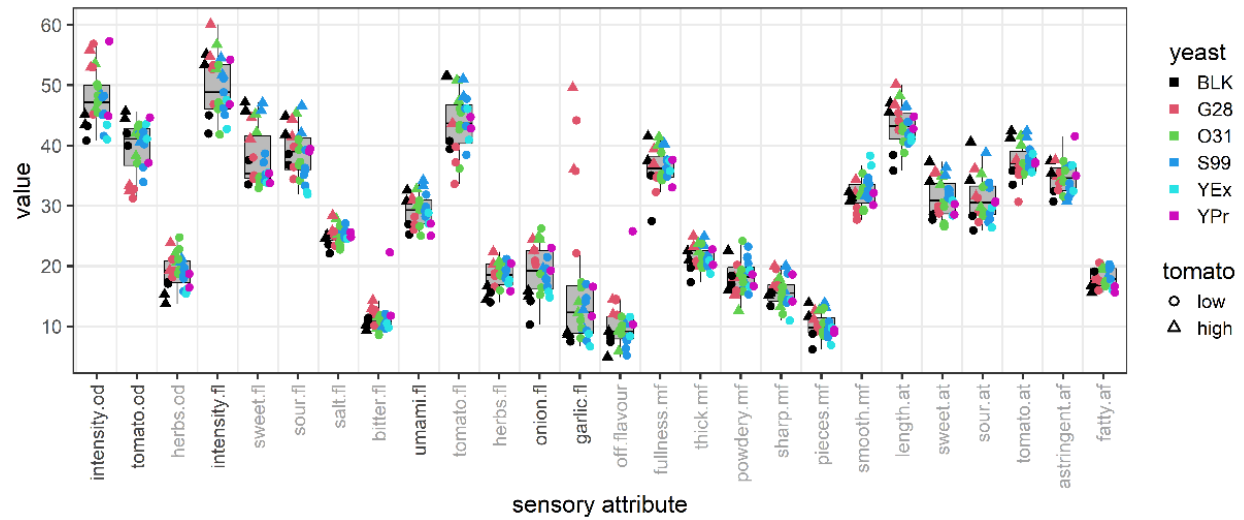

**Figure S1:** Original sensory scores of all samples and flavor attributes. Colors represent the added yeast derived process flavors and shapes represent tomato dosage. BLK= tomato soup without yeast derived products.

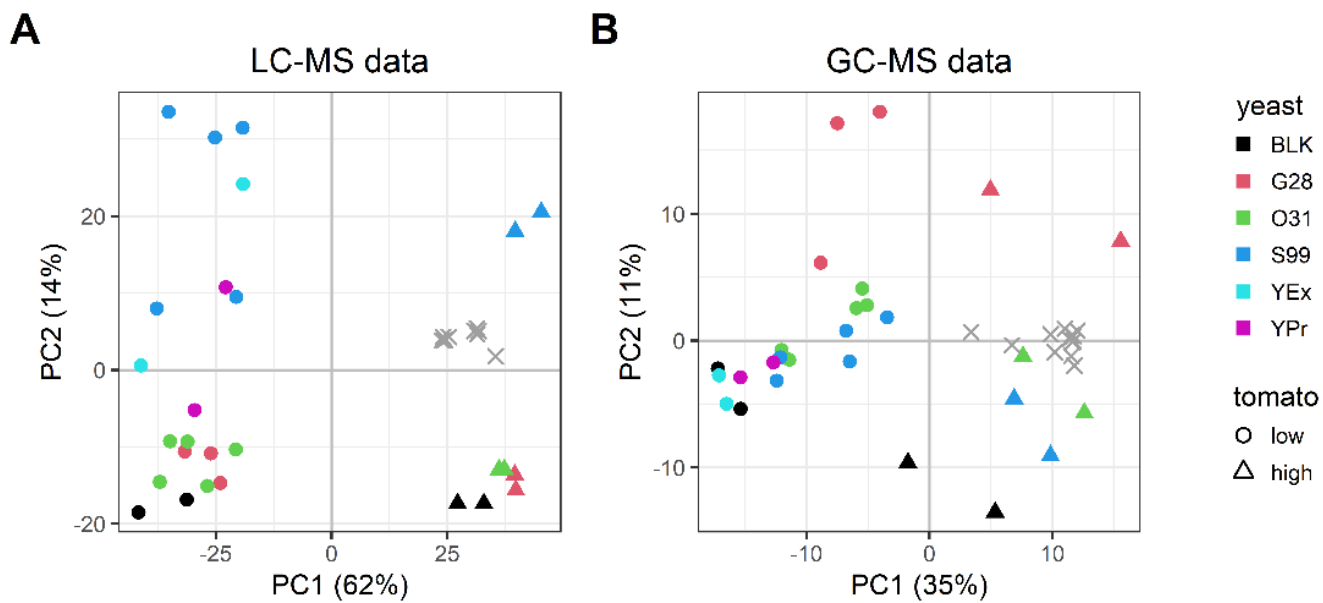

**Figure S2:** PCA score plots including the quality control samples (QC samples) as grey crosses which were produced as indicated in table S1. Colors represent the added yeast derived process flavors and shapes represent tomato dosage. BLK= tomato soup without yeast derived products. A: Log-transformed, autoscaled LC-MS data. B: Log-transformed, autoscaled GC-MS data.

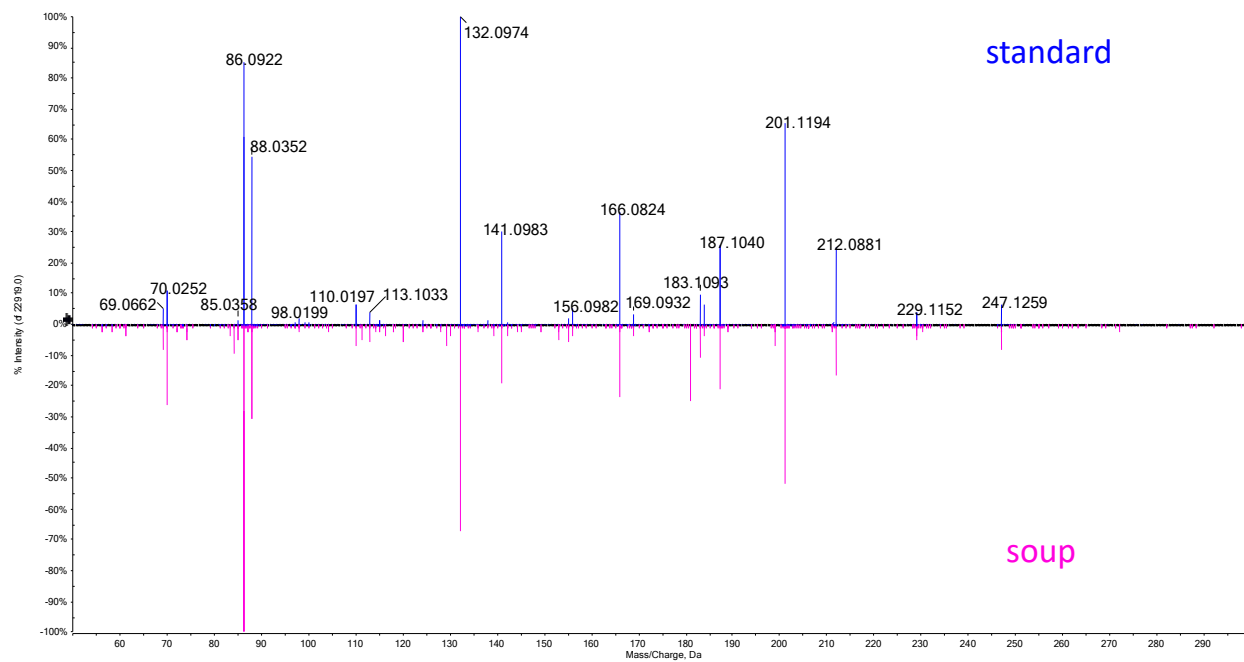

**Figure S3** MS/MS spectra of Asp-Leu in tomato soup 05-1 mirrored against a pure standard

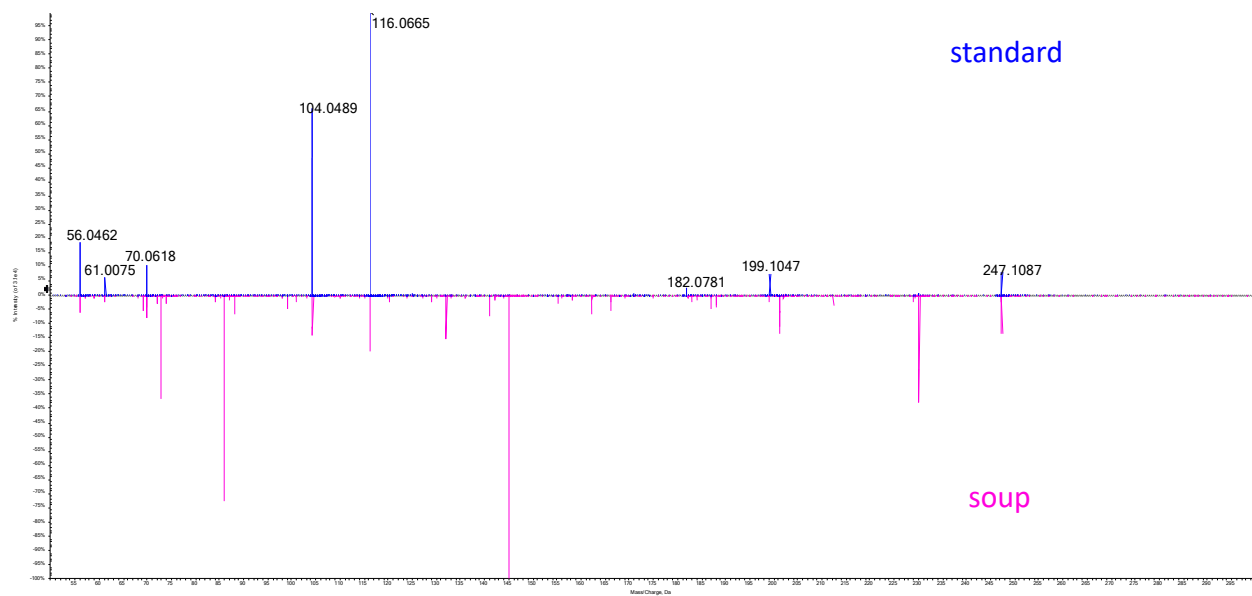

**Figure S4** MS/MS spectra of Met-Pro in tomato soup 19-2 mirrored against a pure standard
